# Supplementary material for: Construction of high coverage whole-genome sequencing libraries from single colon crypts without DNA extraction or whole-genome amplification
Source: PubMed Central journal article supplement (PMC10142246; doi:10.1186/s13104-023-06333-y), 2023-04-27
Supplement: 13104_2023_6333_MOESM1_ESM.pdf [file 13104_2023_6333_MOESM1_ESM.pdf]

Supplemental Materials

Post PCR Enrichment Assessment and Workflow for Crypt Library Sequencing

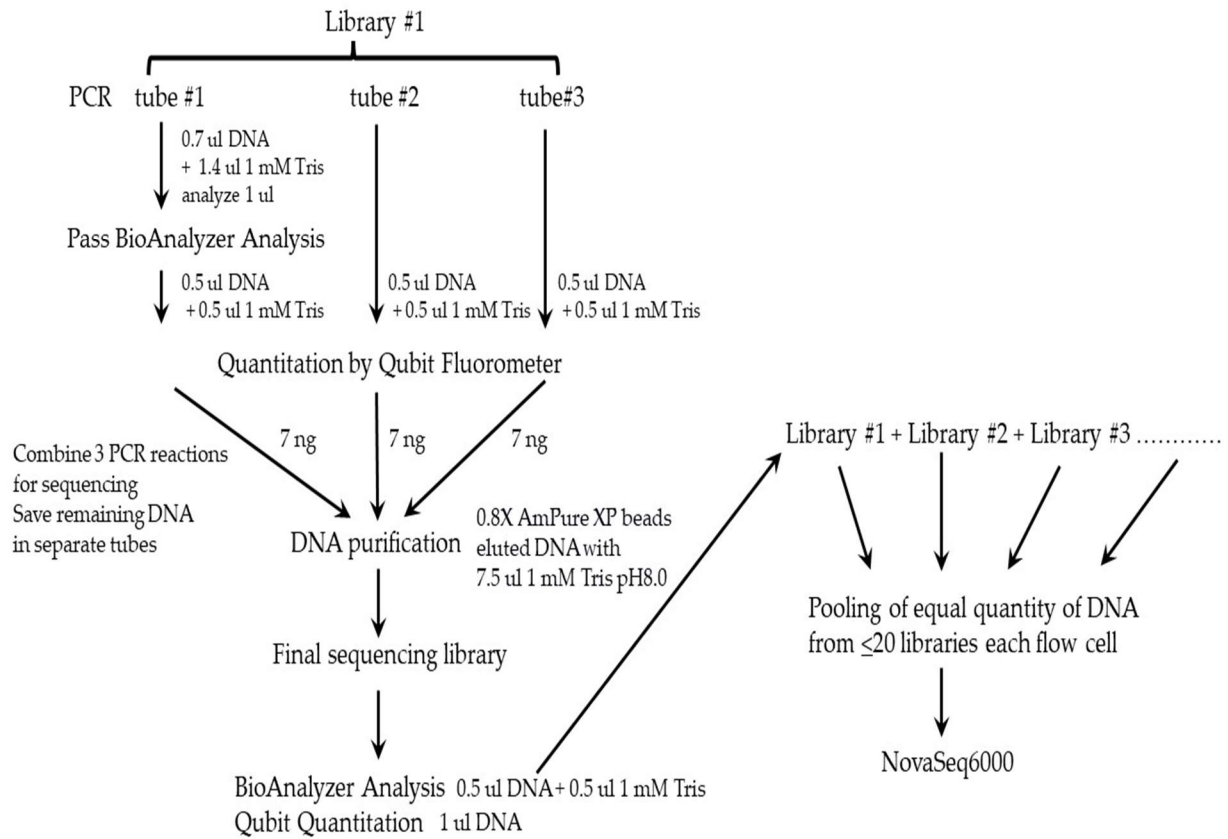

Figure S1 Workflow of post PCR quality assessment and library pooling for crypt libraries.

Assay Class: High Sensitivity DNA Assay  
 Data Path: C:\...gh Sensitivity DNA Assay\_DE72902417\_2021-05-27\_15-11-39.xad

Created: 5/27/2021 3:11:39 PM  
 Modified: 5/27/2021 4:05:38 PM

**Electrophoresis File Run Summary**

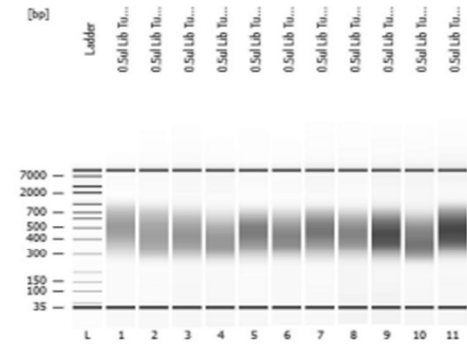

**Instrument Information:**  
 Instrument Name: DE72902417      Firmware: C.01.069  
 Serial#: DE72902417              Type: G2939A

**Assay Information:**  
 Assay Origin Path: C:\Program Files\Agilent\2100 bioanalyzer\2100 expert\assays\dsDNA\High Sensitivity DNA.xsy  
 Assay Class: High Sensitivity DNA Assay  
 Version: 1.03  
 Assay Comments: Copyright © 2003-2010 Agilent Technologies

**Chip Information:**  
 Chip Lot #:   
 Reagent Kit Lot #:   
 Chip Comments:

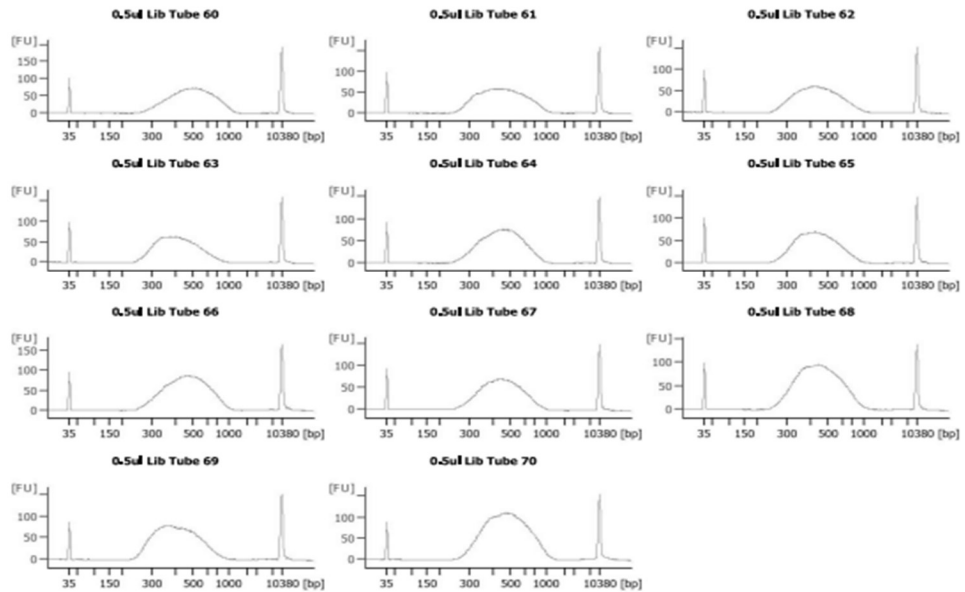

Figure S2 A representative assay output from BioAnalyzer.

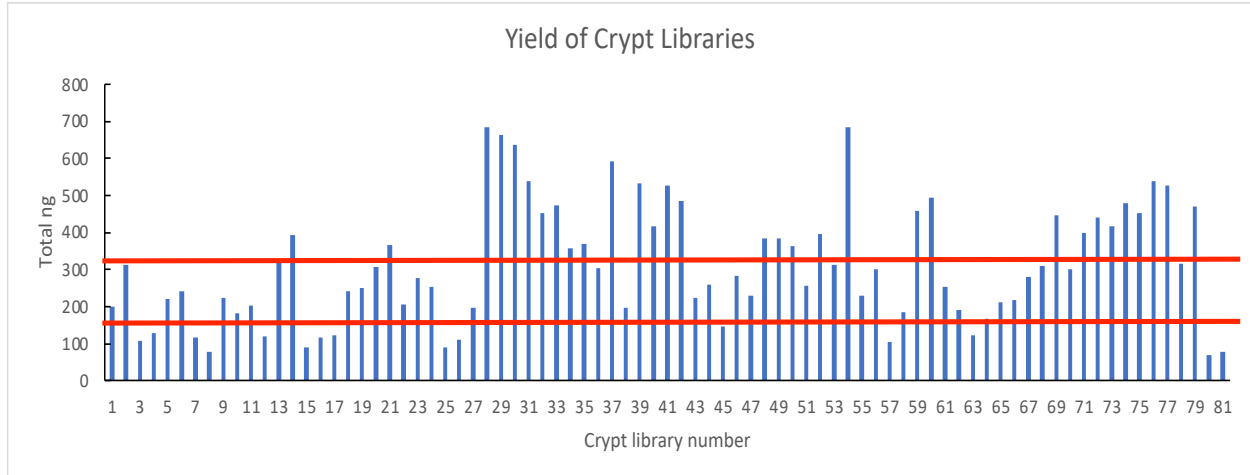

Figure S3 Total DNA quantity of 81 crypt libraries. Each bar presents the quantity of DNA yielded from each of the 81 crypt libraries. Each of the three PCR tubes from the same library contains 11.5 ul of DNA and quantity of the DNA in each PCR tube is calculated based on the quantitation of 0.5 ul of DNA from the specific PCR tube by Qubit assay. The total DNA quantity of the final crypt libraries is the sum of the amount of DNA in three PCR tubes of the same library. The two red horizontal lines indicate the expected range of yield (160 ng to 320 ng) from 6 ng of input DNA with 10 PCR cycles of enrichment using the NEBNext Ultra DNA library Prep Kit according to the manufacturer.

Table S1 Whole Genome Sequencing Post-Alignment Output

| Individual                  | Sample_IDs                  | Library type | Reads Mapped (x10 <sup>6</sup> ) | % Aligned | Average Insert Size (bp) | Median Coverage | Bases ≥ 10X | Bases ≥ 20X | Bases ≥ 30X | % Duplications | % GC |
|-----------------------------|-----------------------------|--------------|----------------------------------|-----------|--------------------------|-----------------|-------------|-------------|-------------|----------------|------|
| 1                           | KUNUSCCLH_0001_LibTube01_T1 | Crypt        | 1474.0                           | 100%      | 304                      | 42              | 95%         | 94%         | 90%         | 16%            | 40%  |
|                             | KUNUSCCLH_0001_LibTube11_T2 | Crypt        | 1411.2                           | 100%      | 283                      | 34              | 95%         | 92%         | 71%         | 19%            | 39%  |
|                             | KUNUSCCLH_0001_LibTube19_T3 | Crypt        | 1319.9                           | 100%      | 309                      | 39              | 95%         | 94%         | 86%         | 19%            | 40%  |
|                             | KUNUSCCLH_0001_LibTube70_T4 | Crypt        | 1440.7                           | 100%      | 286                      | 44              | 95%         | 94%         | 90%         | 15%            | 41%  |
|                             | KUNUSCCLH_0001_LibTube77_T5 | Crypt        | 1280.2                           | 96%       | 285                      | 40              | 95%         | 94%         | 84%         | 18%            | 43%  |
| KUNUSCCLH_0001_LibTube81_C1 | Bulk                        | 1277.1       | 99%                              | 286       | 38                       | 95%             | 90%         | 72%         | 17%         | 43%            |      |
| 2                           | KUNUSCCLH_0002_LibTube02_T1 | Crypt        | 1519.1                           | 100%      | 259                      | 44              | 96%         | 93%         | 87%         | 11%            | 41%  |
|                             | KUNUSCCLH_0002_LibTube05_T2 | Crypt        | 1239.3                           | 100%      | 268                      | 37              | 95%         | 90%         | 73%         | 21%            | 42%  |
|                             | KUNUSCCLH_0002_LibTube12_T3 | Crypt        | 1706.0                           | 100%      | 293                      | 47              | 96%         | 94%         | 88%         | 18%            | 40%  |
|                             | KUNUSCCLH_0002_LibTube26_T4 | Crypt        | 1355.5                           | 100%      | 241                      | 34              | 94%         | 84%         | 63%         | 11%            | 42%  |
|                             | KUNUSCCLH_0002_LibTube71_T5 | Crypt        | 1288.2                           | 100%      | 290                      | 39              | 96%         | 92%         | 83%         | 19%            | 40%  |
| KUNUSCCLH_0002_LibTube82_C1 | Bulk                        | 1260.8       | 99%                              | 285       | 39                       | 96%             | 92%         | 82%         | 10%         | 41%            |      |
| 3                           | KUNUSCCLH_0003_LibTube06_T1 | Crypt        | 1728.5                           | 100%      | 245                      | 48              | 95%         | 94%         | 90%         | 19%            | 42%  |
|                             | KUNUSCCLH_0003_LibTube13_T2 | Crypt        | 1431.4                           | 100%      | 283                      | 35              | 95%         | 93%         | 78%         | 15%            | 40%  |
|                             | KUNUSCCLH_0003_LibTube20_T3 | Crypt        | 1569.4                           | 100%      | 318                      | 47              | 95%         | 94%         | 92%         | 14%            | 40%  |
|                             | KUNUSCCLH_0003_LibTube27_T4 | Crypt        | 1769.6                           | 100%      | 248                      | 35              | 95%         | 92%         | 74%         | 18%            | 41%  |
|                             | KUNUSCCLH_0003_LibTube28_T5 | Crypt        | 1192.6                           | 100%      | 297                      | 35              | 95%         | 93%         | 76%         | 16%            | 40%  |
| KUNUSCCLH_0003_LibTube83_C1 | Bulk                        | 1149.6       | 99%                              | 257       | 32                       | 95%             | 92%         | 65%         | 17%         | 41%            |      |
| 4                           | KUNUSCCLH_0004_LibTube07_T1 | Crypt        | 1500.3                           | 100%      | 234                      | 42              | 95%         | 93%         | 81%         | 16%            | 42%  |
|                             | KUNUSCCLH_0004_LibTube14_T2 | Crypt        | 1457.9                           | 100%      | 282                      | 45              | 95%         | 94%         | 91%         | 18%            | 41%  |
|                             | KUNUSCCLH_0004_LibTube21_T3 | Crypt        | 1156.0                           | 100%      | 286                      | 35              | 95%         | 93%         | 76%         | 15%            | 40%  |
|                             | KUNUSCCLH_0004_LibTube29_T4 | Crypt        | 1178.6                           | 100%      | 265                      | 36              | 95%         | 92%         | 72%         | 15%            | 42%  |
|                             | KUNUSCCLH_0004_LibTube72_T5 | Crypt        | 1254.7                           | 100%      | 278                      | 38              | 95%         | 94%         | 83%         | 16%            | 41%  |
| KUNUSCCLH_0004_LibTube84_C1 | Bulk                        | 1080.0       | 99%                              | 278       | 33                       | 95%             | 92%         | 67%         | 17%         | 41%            |      |
| 5                           | KUNUSCCLH_0005_LibTube08_T1 | Crypt        | 1789.2                           | 100%      | 252                      | 45              | 96%         | 93%         | 86%         | 19%            | 41%  |
|                             | KUNUSCCLH_0005_LibTube15_T2 | Crypt        | 1252.8                           | 100%      | 302                      | 39              | 96%         | 92%         | 82%         | 16%            | 40%  |
|                             | KUNUSCCLH_0005_LibTube22_T3 | Crypt        | 1347.5                           | 100%      | 258                      | 40              | 96%         | 91%         | 78%         | 18%            | 42%  |
|                             | KUNUSCCLH_0005_LibTube30_T4 | Crypt        | 1930.1                           | 100%      | 247                      | 51              | 96%         | 94%         | 90%         | 14%            | 42%  |
|                             | KUNUSCCLH_0005_LibTube42_T5 | Crypt        | 2008.1                           | 100%      | 278                      | 60              | 96%         | 95%         | 92%         | 19%            | 42%  |
| KUNUSCCLH_0005_LibTube85_C1 | Bulk                        | 1349.9       | 99%                              | 302       | 41                       | 95%             | 90%         | 75%         | 16%         | 44%            |      |
| 6                           | KUNUSCCLH_0006_LibTube16_T1 | Crypt        | 1478.3                           | 100%      | 282                      | 33              | 95%         | 89%         | 66%         | 24%            | 40%  |
|                             | KUNUSCCLH_0006_LibTube23_T2 | Crypt        | 1732.5                           | 98%       | 322                      | 53              | 96%         | 95%         | 90%         | 19%            | 41%  |
|                             | KUNUSCCLH_0006_LibTube31_T3 | Crypt        | 1655.3                           | 100%      | 247                      | 49              | 96%         | 94%         | 89%         | 12%            | 42%  |
|                             | KUNUSCCLH_0006_LibTube43_T4 | Crypt        | 1525.2                           | 100%      | 277                      | 46              | 96%         | 93%         | 86%         | 16%            | 42%  |
|                             | KUNUSCCLH_0006_LibTube78_T5 | Crypt        | 1401.5                           | 95%       | 280                      | 43              | 96%         | 93%         | 86%         | 18%            | 43%  |
| KUNUSCCLH_0006_LibTube86_C1 | Bulk                        | 1319.4       | 99%                              | 259       | 39                       | 96%             | 91%         | 76%         | 21%         | 43%            |      |
| 7                           | KUNUSCCLH_0007_LibTube09_T1 | Crypt        | 1687.1                           | 100%      | 254                      | 44              | 96%         | 91%         | 80%         | 21%            | 42%  |
|                             | KUNUSCCLH_0007_LibTube17_T2 | Crypt        | 1318.7                           | 100%      | 289                      | 35              | 95%         | 90%         | 73%         | 16%            | 40%  |
|                             | KUNUSCCLH_0007_LibTube24_T3 | Crypt        | 1259.8                           | 100%      | 273                      | 39              | 96%         | 91%         | 79%         | 15%            | 42%  |
|                             | KUNUSCCLH_0007_LibTube32_T4 | Crypt        | 1499.4                           | 100%      | 243                      | 43              | 96%         | 92%         | 83%         | 19%            | 42%  |
|                             | KUNUSCCLH_0007_LibTube55_T5 | Crypt        | 1093.3                           | 100%      | 269                      | 34              | 95%         | 88%         | 65%         | 15%            | 42%  |
| KUNUSCCLH_0007_LibTube87_C1 | Bulk                        | 1737.2       | 99%                              | 254       | 51                       | 96%             | 94%         | 87%         | 20%         | 43%            |      |
| 8                           | KUNUSCCLH_0008_LibTube10_T1 | Crypt        | 1473.4                           | 100%      | 235                      | 38              | 95%         | 88%         | 71%         | 18%            | 43%  |
|                             | KUNUSCCLH_0008_LibTube18_T2 | Crypt        | 1398.5                           | 100%      | 273                      | 33              | 95%         | 90%         | 69%         | 18%            | 40%  |
|                             | KUNUSCCLH_0008_LibTube25_T3 | Crypt        | 1464.6                           | 100%      | 292                      | 46              | 96%         | 93%         | 86%         | 14%            | 42%  |
|                             | KUNUSCCLH_0008_LibTube33_T4 | Crypt        | 1655.6                           | 100%      | 261                      | 48              | 96%         | 94%         | 88%         | 17%            | 42%  |
|                             | KUNUSCCLH_0008_LibTube62_T5 | Crypt        | 1455.1                           | 100%      | 247                      | 39              | 95%         | 90%         | 75%         | 14%            | 43%  |
| KUNUSCCLH_0008_LibTube88_C1 | Bulk                        | 1279.3       | 99%                              | 263       | 39                       | 95%             | 90%         | 74%         | 14%         | 43%            |      |
| 9                           | KUNUSCCLH_0009_LibTube34_T1 | Crypt        | 1118.7                           | 100%      | 306                      | 34              | 95%         | 90%         | 71%         | 17%            | 41%  |
|                             | KUNUSCCLH_0009_LibTube46_T2 | Crypt        | 1333.6                           | 99%       | 280                      | 31              | 95%         | 89%         | 59%         | 14%            | 47%  |
|                             | KUNUSCCLH_0009_LibTube56_T3 | Crypt        | 1132.0                           | 100%      | 301                      | 32              | 95%         | 89%         | 63%         | 15%            | 40%  |
|                             | KUNUSCCLH_0009_LibTube63_T4 | Crypt        | 1814.7                           | 100%      | 231                      | 45              | 95%         | 89%         | 77%         | 20%            | 44%  |
|                             | KUNUSCCLH_0009_LibTube73_T5 | Crypt        | 1364.7                           | 100%      | 277                      | 37              | 96%         | 91%         | 80%         | 15%            | 41%  |
| KUNUSCCLH_0009_LibTube89_C1 | Bulk                        | 1108.8       | 99%                              | 285       | 36                       | 95%             | 90%         | 73%         | 17%         | 42%            |      |
| 10                          | KUNUSCCLH_0010_LibTube35_T1 | Crypt        | 2035.0                           | 100%      | 312                      | 58              | 96%         | 95%         | 92%         | 20%            | 41%  |
|                             | KUNUSCCLH_0010_LibTube47_T2 | Crypt        | 1912.3                           | 99%       | 272                      | 49              | 96%         | 94%         | 89%         | 19%            | 41%  |
|                             | KUNUSCCLH_0010_LibTube64_T3 | Crypt        | 1334.4                           | 99%       | 259                      | 35              | 95%         | 85%         | 64%         | 16%            | 43%  |
|                             | KUNUSCCLH_0010_LibTube79_T4 | Crypt        | 1150.7                           | 93%       | 293                      | 34              | 95%         | 90%         | 71%         | 18%            | 42%  |
|                             | KUNUSCCLH_0010_LibTube80_T5 | Crypt        | 1340.6                           | 94%       | 285                      | 40              | 96%         | 92%         | 83%         | 17%            | 42%  |
| KUNUSCCLH_0010_LibTube90_C1 | Bulk                        | 1194.1       | 99%                              | 259       | 36                       | 95%             | 87%         | 68%         | 15%         | 43%            |      |
| 11                          | KUNUSCCLH_0011_LibTube36_T1 | Crypt        | 1242.9                           | 100%      | 306                      | 38              | 96%         | 91%         | 80%         | 16%            | 41%  |
|                             | KUNUSCCLH_0011_LibTube48_T2 | Crypt        | 1127.1                           | 99%       | 302                      | 33              | 95%         | 89%         | 66%         | 16%            | 41%  |
|                             | KUNUSCCLH_0011_LibTube52_T3 | Crypt        | 1480.1                           | 100%      | 251                      | 39              | 96%         | 91%         | 77%         | 17%            | 42%  |
|                             | KUNUSCCLH_0011_LibTube57_T4 | Crypt        | 1182.9                           | 100%      | 305                      | 37              | 96%         | 91%         | 78%         | 19%            | 41%  |
|                             | KUNUSCCLH_0011_LibTube65_T5 | Crypt        | 1455.5                           | 100%      | 248                      | 37              | 95%         | 88%         | 69%         | 20%            | 43%  |
| KUNUSCCLH_0011_LibTube91_C1 | Bulk                        | 2519.7       | 99%                              | 268       | 78                       | 96%             | 96%         | 94%         | 18%         | 44%            |      |
| 12                          | KUNUSCCLH_0012_LibTube03_T1 | Crypt        | 1214.1                           | 100%      | 276                      | 34              | 95%         | 90%         | 71%         | 17%            | 41%  |
|                             | KUNUSCCLH_0012_LibTube37_T2 | Crypt        | 1182.8                           | 100%      | 291                      | 37              | 96%         | 91%         | 76%         | 20%            | 42%  |
|                             | KUNUSCCLH_0012_LibTube49_T4 | Crypt        | 1195.0                           | 100%      | 286                      | 35              | 96%         | 91%         | 75%         | 17%            | 41%  |
|                             | KUNUSCCLH_0012_LibTube53_T5 | Crypt        | 1294.0                           | 100%      | 245                      | 35              | 95%         | 86%         | 65%         | 16%            | 43%  |
|                             | KUNUSCCLH_0012_LibTube98_T6 | Crypt        | 1618.1                           | 93%       | 240                      | 37              | 96%         | 90%         | 74%         | 20%            | 44%  |
| KUNUSCCLH_0012_LibTube99_T7 | Crypt                       | 1639.3       | 93%                              | 257       | 34                       | 95%             | 89%         | 69%         | 20%         | 44%            |      |
| KUNUSCCLH_0012_LibTube92_C1 | Bulk                        | 1202.7       | 100%                             | 284       | 38                       | 95%             | 88%         | 69%         | 13%         | 44%            |      |
| 13                          | KUNUSCCLH_0013_LibTube38_T1 | Crypt        | 1186.5                           | 100%      | 306                      | 38              | 95%         | 93%         | 82%         | 17%            | 41%  |
|                             | KUNUSCCLH_0013_LibTube50_T2 | Crypt        | 1242.7                           | 100%      | 281                      | 36              | 95%         | 94%         | 80%         | 16%            | 41%  |
|                             | KUNUSCCLH_0013_LibTube58_T3 | Crypt        | 1865.0                           | 99%       | 283                      | 30              | 95%         | 91%         | 52%         | 21%            | 51%  |
|                             | KUNUSCCLH_0013_LibTube66_T4 | Crypt        | 1291.3                           | 100%      | 263                      | 36              | 95%         | 90%         | 71%         | 16%            | 42%  |
|                             | KUNUSCCLH_0013_LibTube74_T5 | Crypt        | 1831.7                           | 100%      | 272                      | 54              | 95%         | 95%         | 94%         | 16%            | 41%  |
| KUNUSCCLH_0013_LibTube93_C1 | Bulk                        | 1617.8       | 98%                              | 210       | 38                       | 94%             | 85%         | 66%         | 17%         | 45%            |      |
| 14                          | KUNUSCCLH_0014_LibTube39_T1 | Crypt        | 1335.3                           | 92%       | 299                      | 34              | 95%         | 93%         | 75%         | 9%             | 43%  |
|                             | KUNUSCCLH_0014_LibTube51_T2 | Crypt        | 1526.1                           | 96%       | 294                      | 44              | 95%         | 94%         | 91%         | 16%            | 42%  |
|                             | KUNUSCCLH_0014_LibTube54_T3 | Crypt        | 1403.6                           | 95%       | 260                      | 34              | 95%         | 92%         | 71%         | 21%            | 43%  |
|                             | KUNUSCCLH_0014_LibTube59_T4 | Crypt        | 1521.3                           | 93%       | 314                      | 35              | 95%         | 94%         | 78%         | 23%            | 42%  |
|                             | KUNUSCCLH_0014_LibTube67_T5 | Crypt        | 1383.9                           | 94%       | 256                      | 32              | 95%         | 89%         | 62%         | 13%            | 43%  |
| KUNUSCCLH_0014_LibTube94_C1 | Bulk                        | 2962.1       | 99%                              | 191       | 60                       | 93%             | 86%         | 77%         | 14%         | 47%            |      |
| 15                          | KUNUSCCLH_0015_LibTube40_T1 | Crypt        | 1471.9                           | 100%      | 282                      | 45              | 96%         | 93%         | 84%         | 15%            | 42%  |
|                             | KUNUSCCLH_0015_LibTube44_T2 | Crypt        | 1606.3                           | 99%       | 272                      | 42              | 96%         | 93%         | 86%         | 21%            | 41%  |
|                             | KUNUSCCLH_0015_LibTube60_T3 | Crypt        | 1617.9                           | 100%      | 291                      | 47              | 96%         | 94%         | 88%         | 16%            | 41%  |
|                             | KUNUSCCLH_0015_LibTube68_T4 | Crypt        | 1319.8                           | 100%      | 257                      | 36              | 95%         | 86%         | 67%         | 17%            | 43%  |
|                             | KUNUSCCLH_0015_LibTube75_T5 | Crypt        | 1417.8                           | 100%      | 242                      | 41              | 95%         | 91%         | 78%         | 17%            | 43%  |
| KUNUSCCLH_0015_LibTube95_C1 | Bulk                        | 2490.2       | 99%                              | 192       | 56                       | 95%             | 91%         | 82%         | 18%         | 46%            |      |
| 16                          | KUNUSCCLH_0016_LibTube41_T1 | Crypt        | 1260.6                           | 99%       | 301                      | 38              | 96%         | 91%         | 79%         | 17%            | 41%  |
|                             | KUNUSCCLH_0016_LibTube45_T2 | Crypt        | 1178.2                           | 99%       | 272                      | 33              | 95%         | 89%         | 65%         | 17%            | 41%  |
|                             | KUNUSCCLH_0016_LibTube61_T3 | Crypt        | 1215.4                           | 100%      | 252                      | 37              | 95%         | 90%         | 72%         | 16%            | 42%  |
|                             | KUNUSCCLH_0016_LibTube69_T4 | Crypt        | 1456.5                           | 100%      | 223                      | 37              | 94%         | 83%         | 65%         | 19%            | 44%  |
|                             | KUNUSCCLH_0016_LibTube76_T5 | Crypt        | 1546.0                           | 100%      | 277                      | 46              | 96%         | 94%         | 88%         | 22%            | 41%  |
| KUNUSCCLH_0016_LibTube96_C1 | Bulk                        | 2237.8       | 99%                              | 199       | 45                       | 92%             | 80%         | 67%         | 18%         | 47%            |      |





Table S4 Population-based principal component analysis of crypt vs bulk.

| SampleID                                                          | Sample Type | PC1       | PC2       | PC3       |
|-------------------------------------------------------------------|-------------|-----------|-----------|-----------|
| KUNUSCCLH_0001_01_LibTube01_R00250S8A2M0000P0000_T1_KHWGSH_A00001 | Crypt       | -56.29752 | -10.55852 | -7.55690  |
| KUNUSCCLH_0001_01_LibTube11_R00250S8A2M0000P0000_T2_KHWGSH_A00002 | Crypt       | -56.31777 | -10.54544 | -7.49554  |
| KUNUSCCLH_0001_01_LibTube19_R00250S8A2M0000P0000_T3_KHWGSH_A00003 | Crypt       | -56.35430 | -10.57444 | -7.41230  |
| KUNUSCCLH_0001_01_LibTube70_R00250S8A2M0000P0000_T4_KHWGSH_A00004 | Crypt       | -56.30202 | -10.58060 | -7.47768  |
| KUNUSCCLH_0001_01_LibTube77_R00250S8A2M0000P0000_T5_KHWGSH_A00005 | Crypt       | -56.32585 | -10.59753 | -7.52504  |
| KUNUSCCLH_0001_01_LibTube81_R00250S8A2M0000P0000_C1_KHWGSH_A00006 | Bulk        | -56.31880 | -10.57569 | -7.51747  |
| KUNUSCCLH_0002_01_LibTube12_R00250S8A2M0000P0000_T3_KHWGSH_A00009 | Crypt       | -54.25466 | -18.52475 | -3.52116  |
| KUNUSCCLH_0002_01_LibTube26_R00250S8A2M0000P0000_T4_KHWGSH_A00010 | Crypt       | -54.22159 | -18.56108 | -3.53539  |
| KUNUSCCLH_0002_01_LibTube27_R00250S8A2M0000P0000_T1_KHWGSH_A00007 | Crypt       | -54.25152 | -18.56788 | -3.53366  |
| KUNUSCCLH_0002_01_LibTube5_R00250S8A2M0000P0000_T2_KHWGSH_A00008  | Crypt       | -54.24189 | -18.52454 | -3.54831  |
| KUNUSCCLH_0002_01_LibTube71_R00250S8A2M0000P0000_T5_KHWGSH_A00011 | Crypt       | -54.30537 | -18.58241 | -3.52506  |
| KUNUSCCLH_0002_01_LibTube82_R00250S8A2M0000P0000_C1_KHWGSH_A00012 | Bulk        | -54.22906 | -18.53449 | -3.52308  |
| KUNUSCCLH_0003_01_LibTube13_R00250S8A2M0000P0000_T2_KHWGSH_A00014 | Crypt       | -64.96521 | -18.18374 | -11.37783 |
| KUNUSCCLH_0003_01_LibTube20_R00250S8A2M0000P0000_T3_KHWGSH_A00015 | Crypt       | -64.97800 | -18.18941 | -11.32948 |
| KUNUSCCLH_0003_01_LibTube27_R00250S8A2M0000P0000_T4_KHWGSH_A00016 | Crypt       | -64.90050 | -18.12944 | -11.34767 |
| KUNUSCCLH_0003_01_LibTube28_R00250S8A2M0000P0000_T5_KHWGSH_A00017 | Crypt       | -64.96009 | -18.22159 | -11.27624 |
| KUNUSCCLH_0003_01_LibTube6_R00250S8A2M0000P0000_T1_KHWGSH_A00013  | Crypt       | -64.92316 | -18.18681 | -11.35875 |
| KUNUSCCLH_0003_01_LibTube83_R00250S8A2M0000P0000_C1_KHWGSH_A00018 | Bulk        | -64.92490 | -18.19135 | -11.32142 |
| KUNUSCCLH_0004_01_LibTube07_R00250S8A2M0000P0000_T1_KHWGSH_A00019 | Crypt       | -62.03934 | -24.22313 | -5.09084  |
| KUNUSCCLH_0004_01_LibTube14_R00250S8A2M0000P0000_T2_KHWGSH_A00020 | Crypt       | -62.06585 | -24.26999 | -5.08497  |
| KUNUSCCLH_0004_01_LibTube21_R00250S8A2M0000P0000_T3_KHWGSH_A00021 | Crypt       | -62.06556 | -24.28022 | -5.14235  |
| KUNUSCCLH_0004_01_LibTube29_R00250S8A2M0000P0000_T4_KHWGSH_A00022 | Crypt       | -61.91150 | -23.92279 | -5.07948  |
| KUNUSCCLH_0004_01_LibTube72_R00250S8A2M0000P0000_T5_KHWGSH_A00023 | Crypt       | -62.09424 | -24.26408 | -5.09019  |
| KUNUSCCLH_0004_01_LibTube84_R00250S8A2M0000P0000_C1_KHWGSH_A00024 | Bulk        | -62.01611 | -24.21641 | -5.11203  |
| KUNUSCCLH_0005_01_LibTube08_R00250S8A2M0000P0000_T1_KHWGSH_A00025 | Crypt       | -63.21500 | -19.68724 | -10.81719 |
| KUNUSCCLH_0005_01_LibTube15_R00250S8A2M0000P0000_T2_KHWGSH_A00026 | Crypt       | -63.48276 | -19.97217 | -10.77986 |
| KUNUSCCLH_0005_01_LibTube22_R00250S8A2M0000P0000_T3_KHWGSH_A00027 | Crypt       | -63.44492 | -20.04104 | -10.70697 |
| KUNUSCCLH_0005_01_LibTube30_R00250S8A2M0000P0000_T4_KHWGSH_A00028 | Crypt       | -63.43338 | -20.04614 | -10.77006 |
| KUNUSCCLH_0005_01_LibTube42_R00250S8A2M0000P0000_T5_KHWGSH_A00029 | Crypt       | -63.52114 | -20.06273 | -10.72425 |
| KUNUSCCLH_0005_01_LibTube85_R00250S8A2M0000P0000_C1_KHWGSH_A00030 | Bulk        | -63.48004 | -20.07118 | -10.73213 |
| KUNUSCCLH_0006_01_LibTube16_R00250S8A2M0000P0000_T1_KHWGSH_A00031 | Crypt       | -59.36943 | -20.45983 | -6.98820  |
| KUNUSCCLH_0006_01_LibTube23_R00250S8A2M0000P0000_T2_KHWGSH_A00032 | Crypt       | -59.43462 | -20.45837 | -7.00995  |
| KUNUSCCLH_0006_01_LibTube31_R00250S8A2M0000P0000_T3_KHWGSH_A00033 | Crypt       | -59.40872 | -20.48823 | -7.02232  |
| KUNUSCCLH_0006_01_LibTube43_R00250S8A2M0000P0000_T4_KHWGSH_A00034 | Crypt       | -59.42295 | -20.48485 | -7.01333  |
| KUNUSCCLH_0006_01_LibTube78_R00250S8A2M0000P0000_T5_KHWGSH_A00035 | Crypt       | -59.35620 | -20.49683 | -7.01636  |
| KUNUSCCLH_0006_01_LibTube86_R00250S8A2M0000P0000_C1_KHWGSH_A00036 | Bulk        | -59.40793 | -20.47136 | -6.98460  |
| KUNUSCCLH_0007_01_LibTube9_R00250S8A2M0000P0000_T1_KHWGSH_A00037  | Crypt       | -63.15699 | -22.32388 | -3.33545  |
| KUNUSCCLH_0007_01_LibTube17_R00250S8A2M0000P0000_T2_KHWGSH_A00038 | Crypt       | -63.15701 | -22.35575 | -3.38428  |
| KUNUSCCLH_0007_01_LibTube24_R00250S8A2M0000P0000_T3_KHWGSH_A00039 | Crypt       | -63.21880 | -22.35069 | -3.31396  |
| KUNUSCCLH_0007_01_LibTube32_R00250S8A2M0000P0000_T4_KHWGSH_A00040 | Crypt       | -63.16642 | -22.36022 | -3.32509  |
| KUNUSCCLH_0007_01_LibTube55_R00250S8A2M0000P0000_T5_KHWGSH_A00041 | Crypt       | -63.18078 | -22.36614 | -3.31939  |
| KUNUSCCLH_0007_01_LibTube87_R00250S8A2M0000P0000_C1_KHWGSH_A00042 | Bulk        | -63.21717 | -22.34470 | -3.35251  |
| KUNUSCCLH_0008_01_LibTube10_R00250S8A2M0000P0000_T1_KHWGSH_A00043 | Crypt       | -58.60257 | -19.13898 | -9.99616  |
| KUNUSCCLH_0008_01_LibTube18_R00250S8A2M0000P0000_T2_KHWGSH_A00044 | Crypt       | -58.58168 | -19.07339 | -9.98650  |
| KUNUSCCLH_0008_01_LibTube25_R00250S8A2M0000P0000_T3_KHWGSH_A00045 | Crypt       | -58.62590 | -19.08831 | -9.97345  |
| KUNUSCCLH_0008_01_LibTube33_R00250S8A2M0000P0000_T4_KHWGSH_A00046 | Crypt       | -58.60571 | -19.06605 | -9.97263  |
| KUNUSCCLH_0008_01_LibTube62_R00250S8A2M0000P0000_T5_KHWGSH_A00047 | Crypt       | -58.59672 | -19.09921 | -9.96482  |
| KUNUSCCLH_0008_01_LibTube88_R00250S8A2M0000P0000_C1_KHWGSH_A00048 | Bulk        | -58.56305 | -19.07978 | -10.01873 |
| KUNUSCCLH_0009_01_LibTube34_R00250S8A2M0000P0000_T1_KHWGSH_A00049 | Crypt       | -55.04364 | -16.08283 | -14.81769 |
| KUNUSCCLH_0009_01_LibTube46_R00250S8A2M0000P0000_T2_KHWGSH_A00050 | Crypt       | -54.92753 | -15.99527 | -14.82274 |
| KUNUSCCLH_0009_01_LibTube56_R00250S8A2M0000P0000_T3_KHWGSH_A00051 | Crypt       | -54.99100 | -15.93871 | -14.82583 |
| KUNUSCCLH_0009_01_LibTube63_R00250S8A2M0000P0000_T4_KHWGSH_A00052 | Crypt       | -54.93791 | -15.97927 | -14.83600 |
| KUNUSCCLH_0009_01_LibTube73_R00250S8A2M0000P0000_T5_KHWGSH_A00053 | Crypt       | -54.95064 | -15.99116 | -14.80402 |
| KUNUSCCLH_0009_01_LibTube89_R00250S8A2M0000P0000_C1_KHWGSH_A00054 | Bulk        | -55.02470 | -16.03176 | -14.76079 |
| KUNUSCCLH_0010_01_LibTube35_R00250S8A2M0000P0000_T1_KHWGSH_A00055 | Crypt       | -62.83368 | -21.94723 | -5.23711  |
| KUNUSCCLH_0010_01_LibTube47_R00250S8A2M0000P0000_T2_KHWGSH_A00056 | Crypt       | -62.77938 | -21.99102 | -5.19295  |
| KUNUSCCLH_0010_01_LibTube64_R00250S8A2M0000P0000_T3_KHWGSH_A00057 | Crypt       | -62.75501 | -21.89980 | -5.22257  |
| KUNUSCCLH_0010_01_LibTube79_R00250S8A2M0000P0000_T4_KHWGSH_A00058 | Crypt       | -62.81527 | -21.95340 | -5.24337  |
| KUNUSCCLH_0010_01_LibTube80_R00250S8A2M0000P0000_T5_KHWGSH_A00059 | Crypt       | -62.79005 | -21.87944 | -5.18010  |
| KUNUSCCLH_0010_01_LibTube90_R00250S8A2M0000P0000_C1_KHWGSH_A00060 | Bulk        | -62.74871 | -21.89841 | -5.20237  |
| KUNUSCCLH_0011_01_LibTube36_R00250S8A2M0000P0000_T1_KHWGSH_A00061 | Crypt       | -59.31933 | -4.94876  | -11.50711 |
| KUNUSCCLH_0011_01_LibTube48_R00250S8A2M0000P0000_T2_KHWGSH_A00062 | Crypt       | -59.32586 | -4.86293  | -11.54315 |
| KUNUSCCLH_0011_01_LibTube52_R00250S8A2M0000P0000_T3_KHWGSH_A00063 | Crypt       | -59.34010 | -4.94060  | -11.57434 |
| KUNUSCCLH_0011_01_LibTube57_R00250S8A2M0000P0000_T4_KHWGSH_A00064 | Crypt       | -59.36746 | -4.86627  | -11.55331 |
| KUNUSCCLH_0011_01_LibTube65_R00250S8A2M0000P0000_T5_KHWGSH_A00065 | Crypt       | -59.41192 | -4.89105  | -11.59997 |
| KUNUSCCLH_0011_01_LibTube91_R00250S8A2M0000P0000_C1_KHWGSH_A00066 | Bulk        | -59.38446 | -4.91468  | -11.55663 |
| KUNUSCCLH_0012_01_LibTube37_R00250S8A2M0000P0000_T3_KHWGSH_A00069 | Crypt       | -60.72794 | -16.28174 | -12.02312 |
| KUNUSCCLH_0012_01_LibTube33_R00250S8A2M0000P0000_T1_KHWGSH_A00067 | Crypt       | -60.66951 | -16.26396 | -12.02951 |
| KUNUSCCLH_0012_01_LibTube49_R00250S8A2M0000P0000_T4_KHWGSH_A00070 | Crypt       | -60.70933 | -16.24541 | -12.00705 |
| KUNUSCCLH_0012_01_LibTube53_R00250S8A2M0000P0000_T5_KHWGSH_A00071 | Crypt       | -60.71334 | -16.28619 | -12.05229 |
| KUNUSCCLH_0012_01_LibTube98_R00250S8A2M0000P0000_T6_KHWGSH_A00097 | Crypt       | -60.67155 | -16.31969 | -12.01111 |
| KUNUSCCLH_0012_01_LibTube99_R00250S8A2M0000P0000_T7_KHWGSH_A00098 | Crypt       | -60.69218 | -16.25088 | -12.02653 |
| KUNUSCCLH_0012_01_LibTube92_R00250S8A2M0000P0000_C1_KHWGSH_A00072 | Bulk        | -60.71197 | -16.29496 | -12.02258 |
| KUNUSCCLH_0013_01_LibTube38_R00250S8A2M0000P0000_T1_KHWGSH_A00073 | Crypt       | -60.92050 | -14.56538 | -8.93196  |
| KUNUSCCLH_0013_01_LibTube50_R00250S8A2M0000P0000_T2_KHWGSH_A00074 | Crypt       | -60.95109 | -14.51123 | -8.88849  |
| KUNUSCCLH_0013_01_LibTube58_R00250S8A2M0000P0000_T3_KHWGSH_A00075 | Crypt       | -60.86661 | -14.44914 | -8.90460  |
| KUNUSCCLH_0013_01_LibTube66_R00250S8A2M0000P0000_T4_KHWGSH_A00076 | Crypt       | -60.97896 | -14.51353 | -8.94317  |
| KUNUSCCLH_0013_01_LibTube74_R00250S8A2M0000P0000_T5_KHWGSH_A00077 | Crypt       | -60.95887 | -14.48307 | -8.94730  |
| KUNUSCCLH_0013_01_LibTube93_R00250S8A2M0000P0000_C1_KHWGSH_A00078 | Bulk        | -60.78902 | -14.47578 | -9.00840  |
| KUNUSCCLH_0014_01_LibTube39_R00250S8A2M0000P0000_T1_KHWGSH_A00079 | Crypt       | -64.84479 | 17.17523  | -6.50672  |
| KUNUSCCLH_0014_01_LibTube51_R00250S8A2M0000P0000_T2_KHWGSH_A00080 | Crypt       | -64.83722 | 17.23138  | -6.52555  |
| KUNUSCCLH_0014_01_LibTube54_R00250S8A2M0000P0000_T3_KHWGSH_A00081 | Crypt       | -64.91245 | 17.23479  | -6.51670  |
| KUNUSCCLH_0014_01_LibTube59_R00250S8A2M0000P0000_T4_KHWGSH_A00082 | Crypt       | -64.86753 | 17.19853  | -6.48966  |
| KUNUSCCLH_0014_01_LibTube67_R00250S8A2M0000P0000_T5_KHWGSH_A00083 | Crypt       | -64.82951 | 17.28488  | -6.52739  |
| KUNUSCCLH_0014_01_LibTube94_R00250S8A2M0000P0000_C1_KHWGSH_A00084 | Bulk        | -64.59359 | 17.29044  | -6.53240  |
| KUNUSCCLH_0015_01_LibTube40_R00250S8A2M0000P0000_T1_KHWGSH_A00085 | Crypt       | -71.90836 | -1.50870  | -14.17252 |
| KUNUSCCLH_0015_01_LibTube44_R00250S8A2M0000P0000_T2_KHWGSH_A00086 | Crypt       | -71.78067 | -1.51245  | -14.29218 |
| KUNUSCCLH_0015_01_LibTube60_R00250S8A2M0000P0000_T3_KHWGSH_A00087 | Crypt       | -71.91135 | -1.51507  | -14.20557 |
| KUNUSCCLH_0015_01_LibTube68_R00250S8A2M0000P0000_T4_KHWGSH_A00088 | Crypt       | -71.78858 | -1.44006  | -14.32027 |
| KUNUSCCLH_0015_01_LibTube75_R00250S8A2M0000P0000_T5_KHWGSH_A00089 | Crypt       | -71.89845 | -1.51053  | -14.26915 |
| KUNUSCCLH_0015_01_LibTube95_R00250S8A2M0000P0000_C1_KHWGSH_A00090 | Bulk        | -71.70359 | -1.45052  | -14.31873 |
| KUNUSCCLH_0016_01_LibTube41_R00250S8A2M0000P0000_T1_KHWGSH_A00091 | Crypt       | -64.65142 | 10.52669  | -5.60516  |
| KUNUSCCLH_0016_01_LibTube45_R00250S8A2M0000P0000_T2_KHWGSH_A00092 | Crypt       | -64.57528 | 10.58763  | -5.69322  |
| KUNUSCCLH_0016_01_LibTube61_R00250S8A2M0000P0000_T3_KHWGSH_A00093 | Crypt       | -64.64276 | 10.62040  | -5.68650  |
| KUNUSCCLH_0016_01_LibTube69_R00250S8A2M0000P0000_T4_KHWGSH_A00094 | Crypt       | -64.59464 | 10.58661  | -5.68672  |
| KUNUSCCLH_0016_01_LibTube76_R00250S8A2M0000P0000_T5_KHWGSH_A00095 | Crypt       | -64.67225 | 10.56988  | -5.65883  |
| KUNUSCCLH_0016_01_LibTube96_R00250S8A2M0000P0000_C1_KHWGSH_A00096 | Bulk        | -64.49662 | 10.65095  | -5.60824  |
